# Supplementary material for: Mutations of genes in synthesis of the carotenoid precursors of ABA lead to pre-harvest sprouting and photo-oxidation in rice
Source: PubMed Central journal article supplement (PMC2327239; doi:10.1111/j.1365-313x.2008.03411.x), 2008-04-01

Supplementary Figures

Supplementary Figure 1

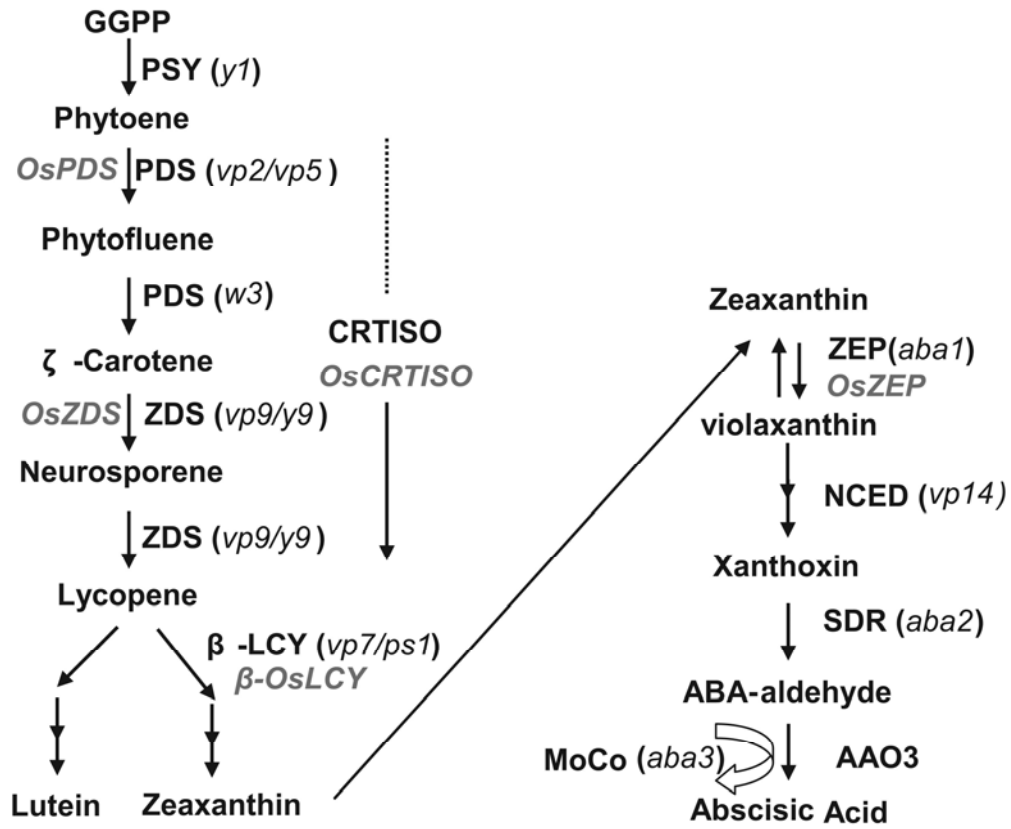

**Supplementary Figure 2**

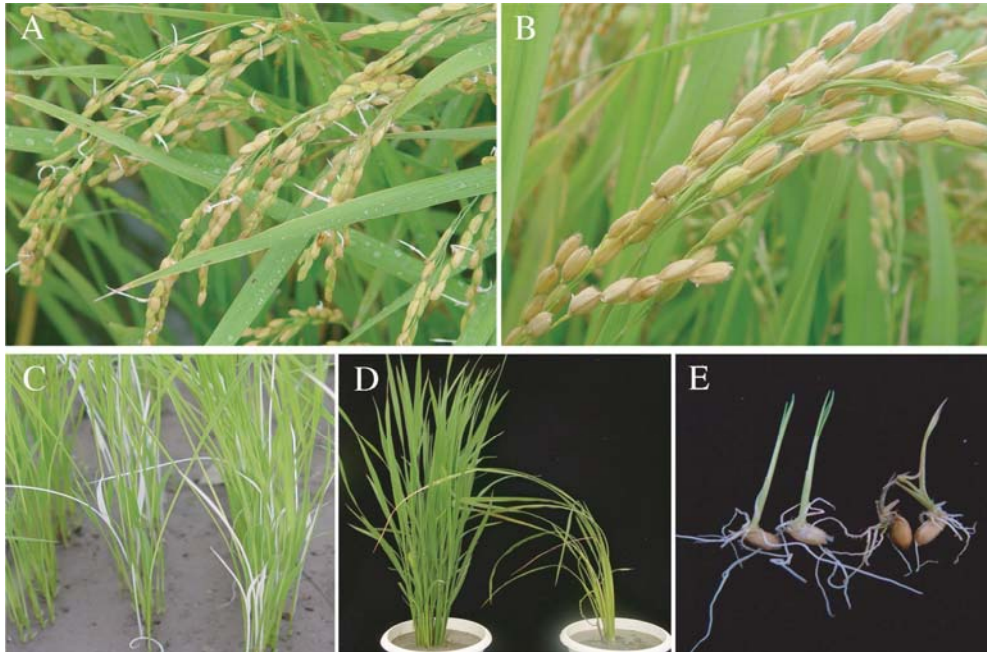

Supplementary Figure 3

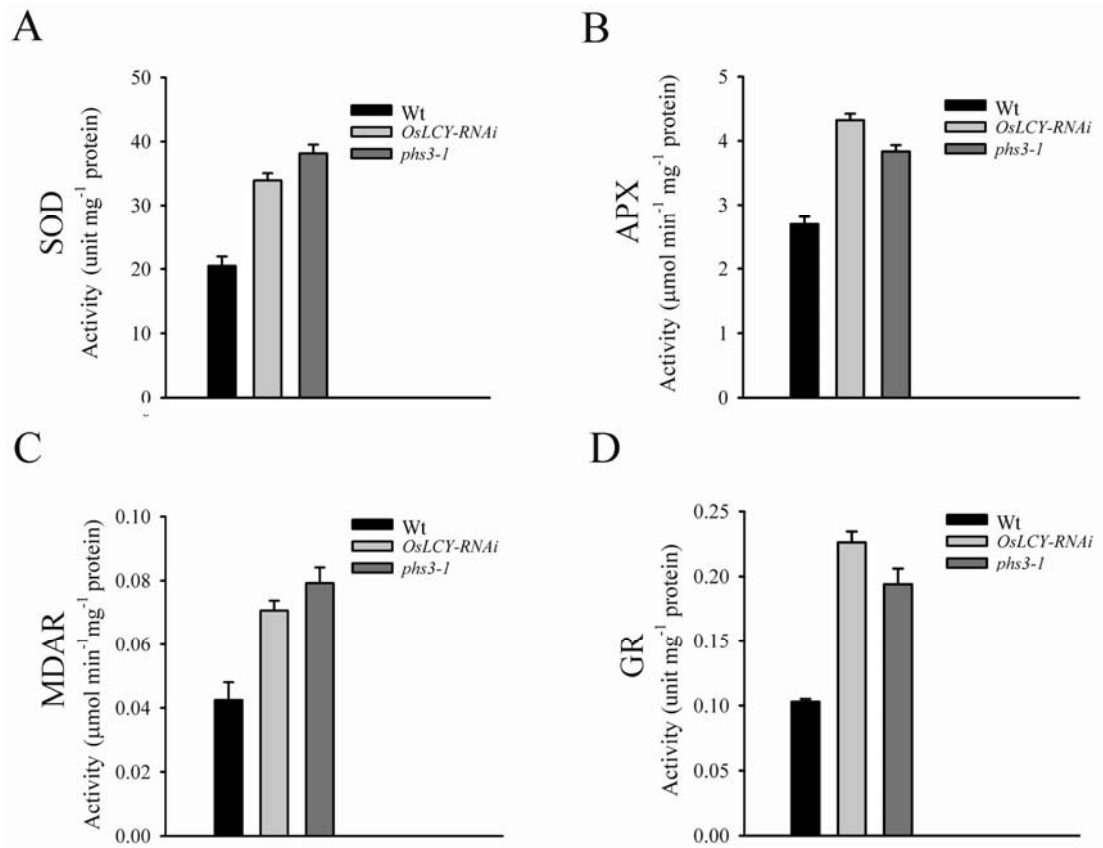

Supplementary Figure 4

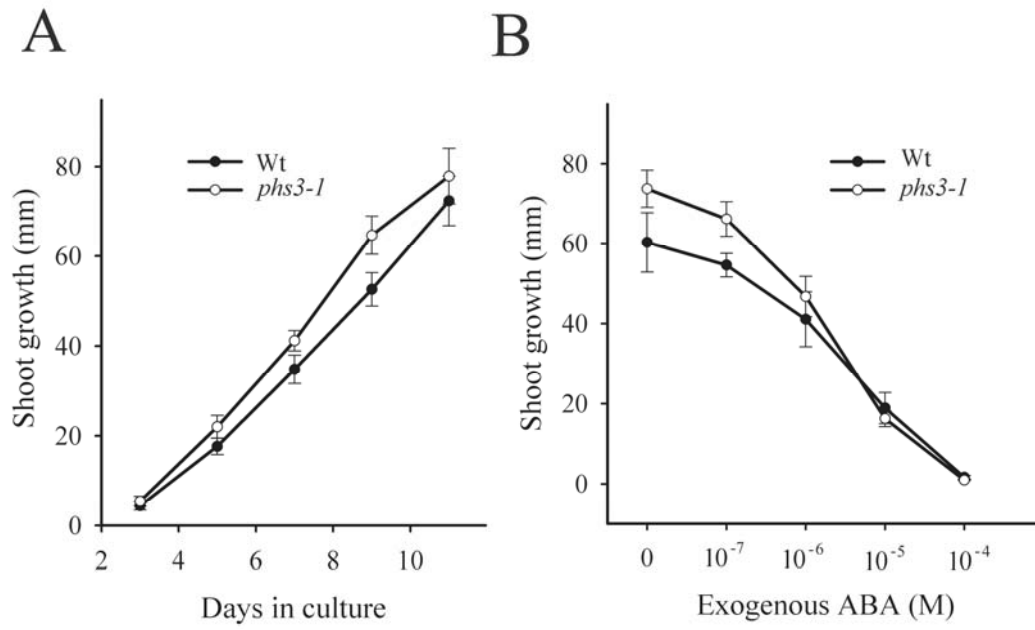

## Supplementary Figure 5

A. *phs1* × TN1 (n = 280)

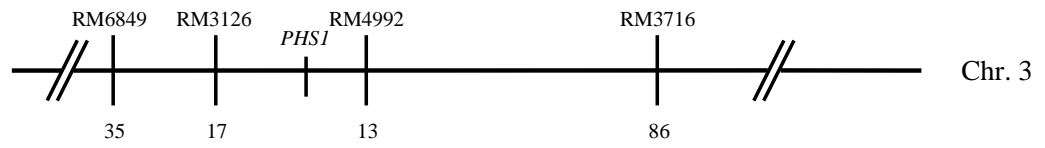

B. *phs2-1* × TN1 (n = 350)

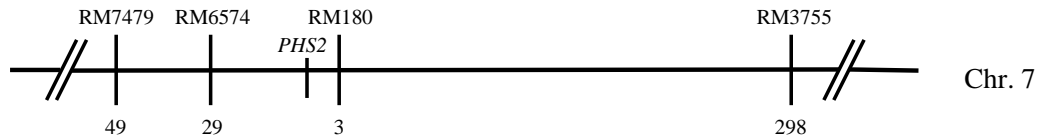

C. *phs3-1* × Minghui 63 (n = 350)

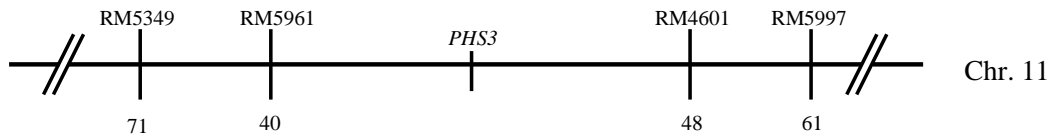

D. *phs4-1* × TN1 (n = 400)

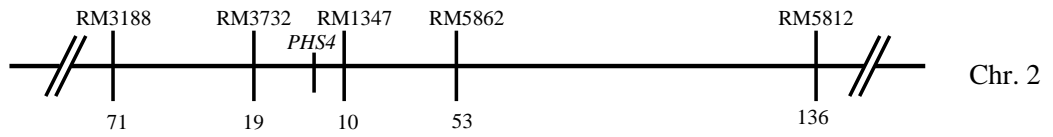

Supplement: tpj0054-0177-SD1.pdf [file tpj0054-0177-SD1.pdf]
